# Supplementary material for: A Replication-Competent HIV Clone Carrying GFP-Env Reveals Rapid Env Recycling at the HIV-1 T Cell Virological Synapse
Source: MDPI journal article supplement (doi:10.3390/v14010038), 2021-12-25
Supplement: s1 [file s1]

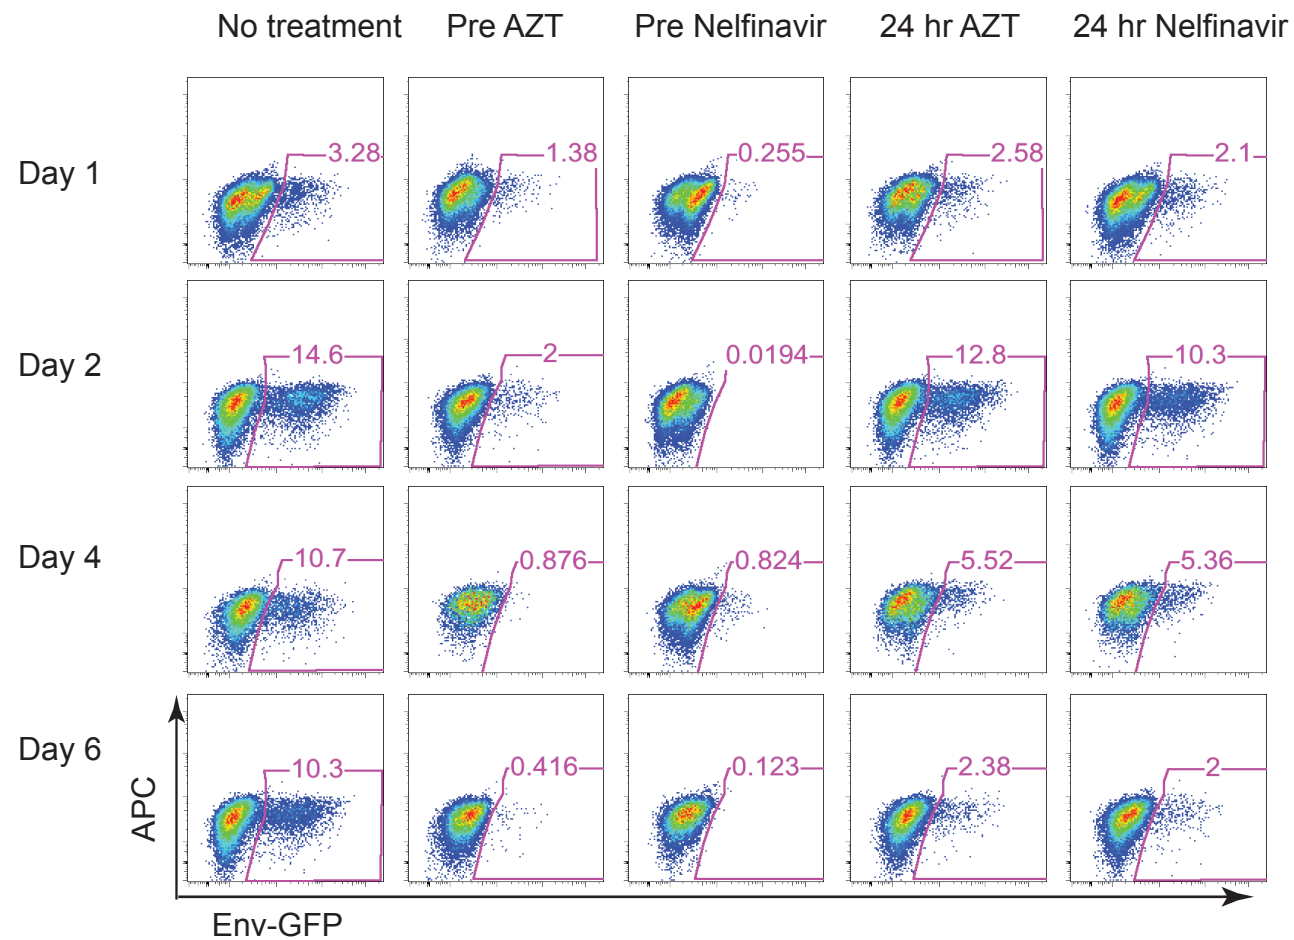

Supplemental Figure S1. Growth curve of HIV Env-V4.2-sfGFP in Jurkat cells with and without of anti-retroviral treatment. Jurkat cells were treated with or without 10 $\mu$ M AZT and/ or Nelfinavir prior to or 24 hr after spinoculation. Samples were collected on day 1, 2, 4 and 6 for flow cytometric analysis of Env-GFP fluorescence signal.
