# Supplementary material for: A Replication-Competent HIV Clone Carrying GFP-Env Reveals Rapid Env Recycling at the HIV-1 T Cell Virological Synapse
Source: Viruses. 2021 Dec 25;14(1):38. doi: 10.3390/v14010038 (PMC8781834; doi:10.3390/v14010038)
Supplement: Supplementary file 1 [file viruses-14-00038-s001.zip]

Archive with 12 entries (12 files):
- Supplemental Figure S1.pdf
- Supplemental-Video-S1.mp4
- Supplemental-Video-S10.mp4
- Supplemental-Video-S11.mp4
- supplemental-video-S2.mp4
- Supplemental-Video-S3.mp4
- Supplemental-Video-S4.mp4
- Supplemental-Video-S5.mp4
- Supplemental-Video-S6.mp4
- Supplemental-Video-S7.mp4
- Supplemental-Video-S8.mp4
- Supplemental-Video-S9.mp4
